# Supplementary material
Source: PubMed Central journal article supplement (PMC4615699)

**A**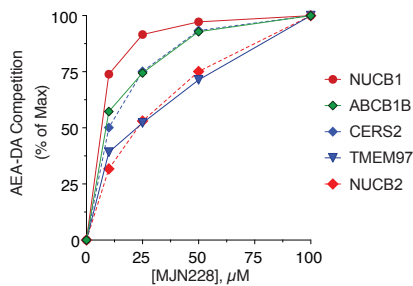**B**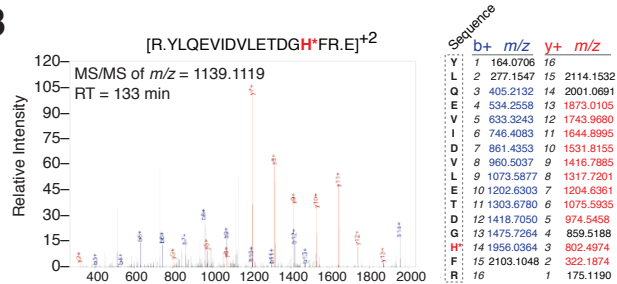**C**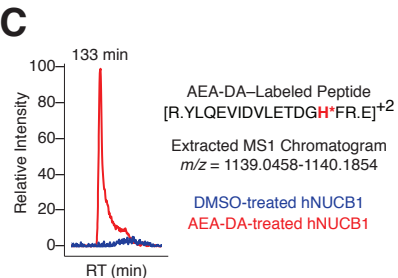**D**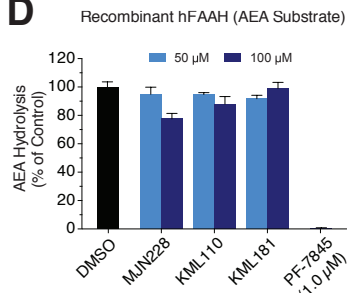**E**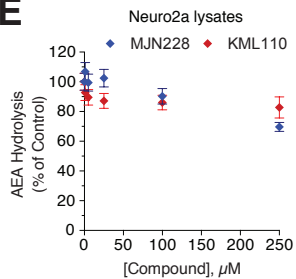**G**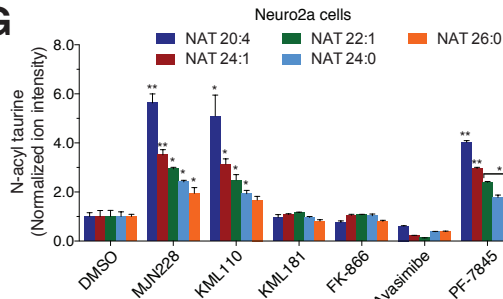**H**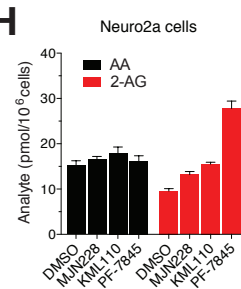**F**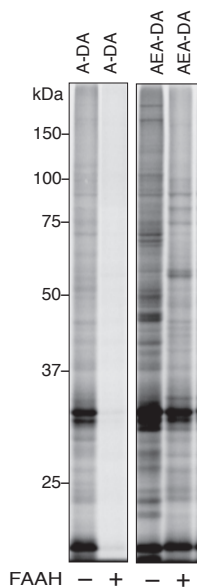**I**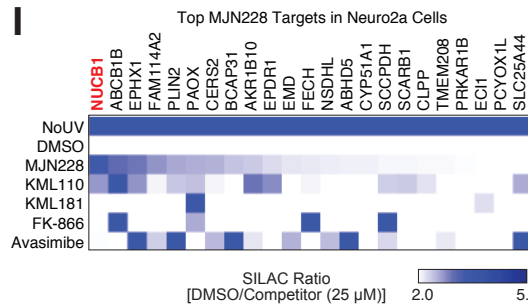**J**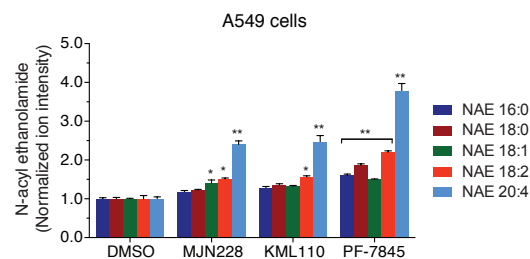**K**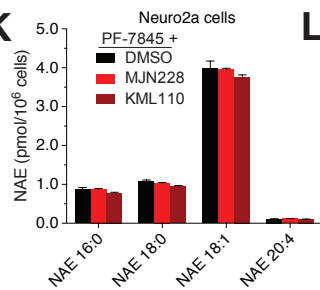**L**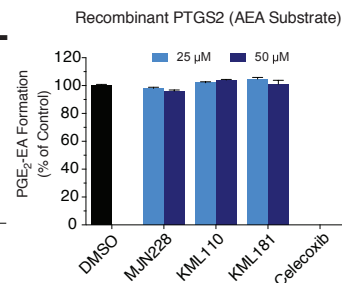**M**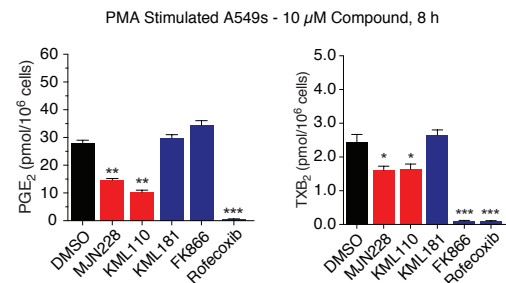

Supplement: NIHMS694110-supplement-1.pdf [file NIHMS694110-supplement-1.pdf]

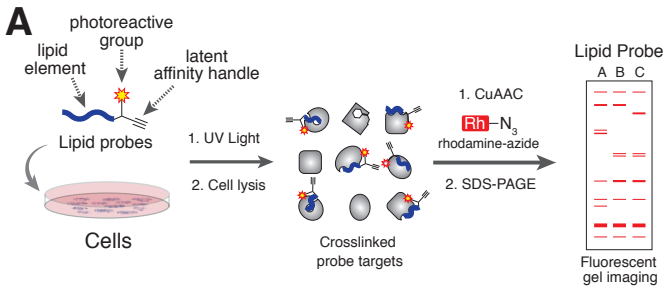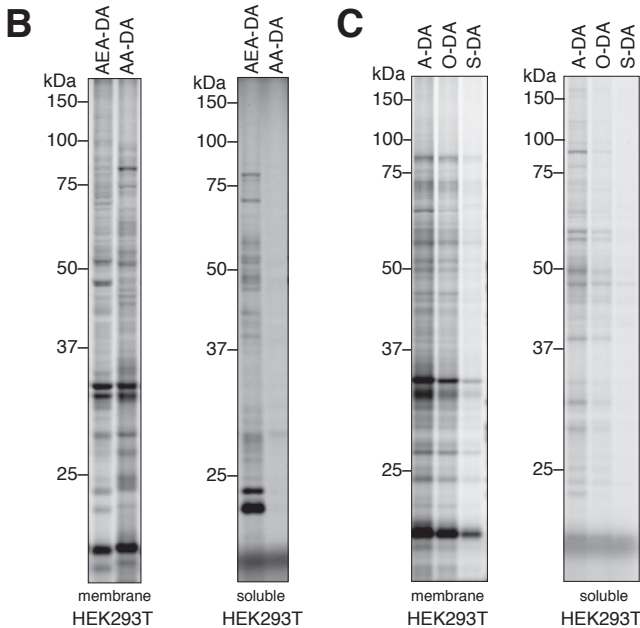

Supplement: NIHMS694110-supplement-2.pdf [file NIHMS694110-supplement-2.pdf]

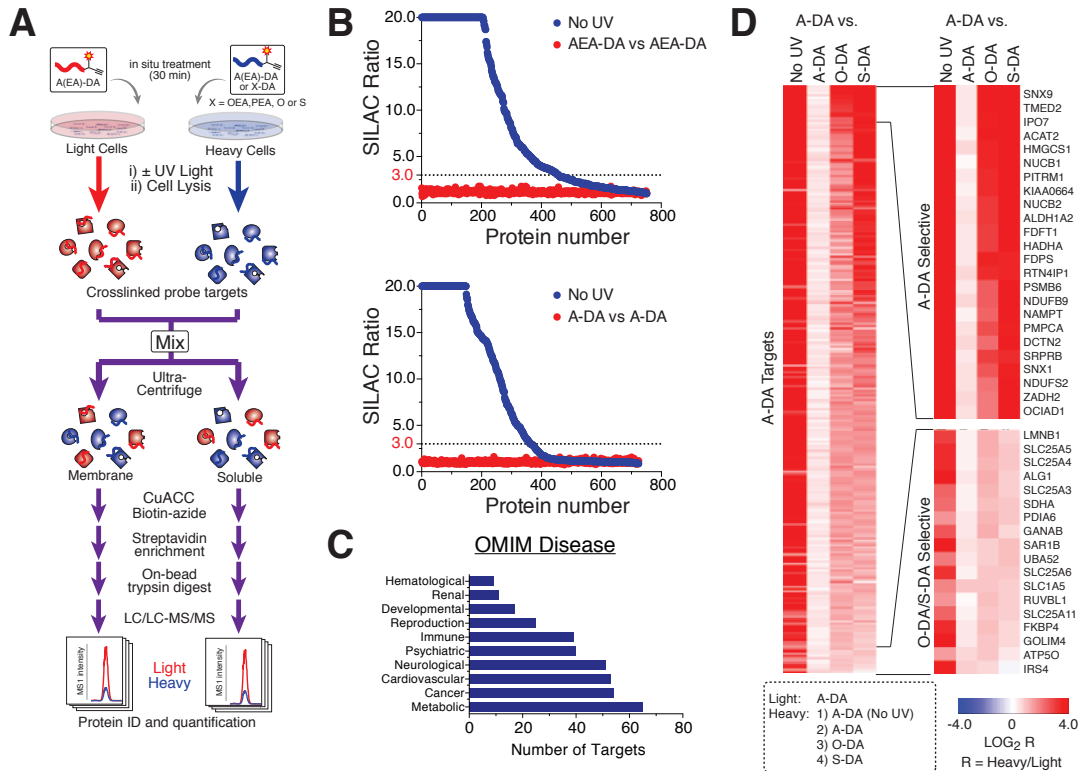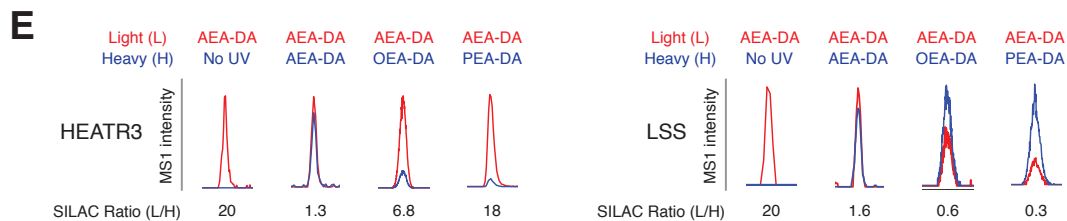

Supplement: NIHMS694110-supplement-3.pdf [file NIHMS694110-supplement-3.pdf]

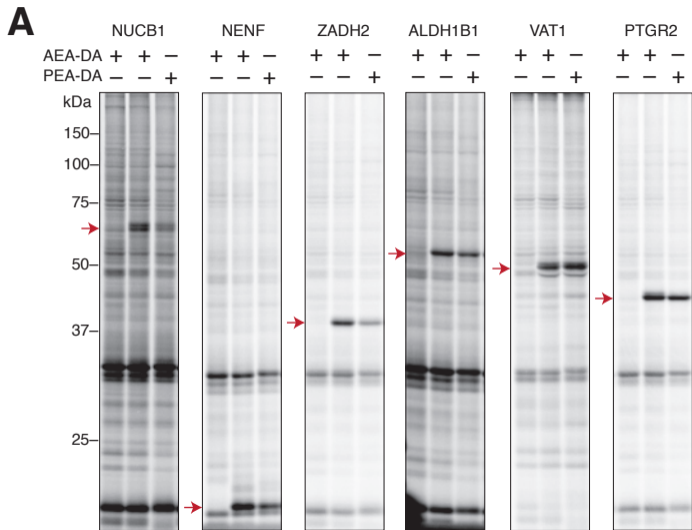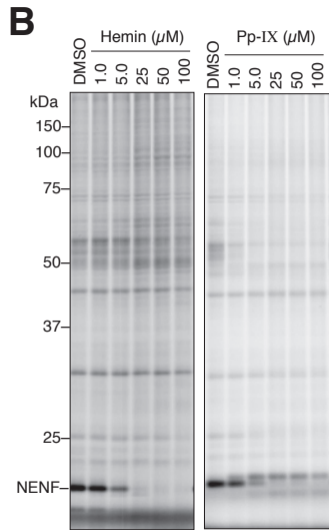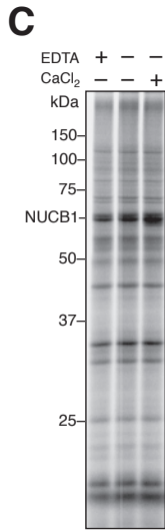

Supplement: NIHMS694110-supplement-4.pdf [file NIHMS694110-supplement-4.pdf]

**A**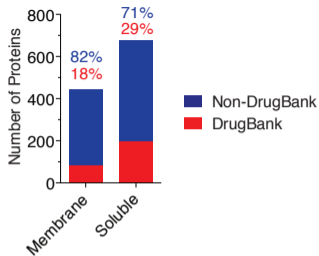**B**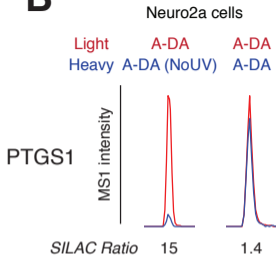**C**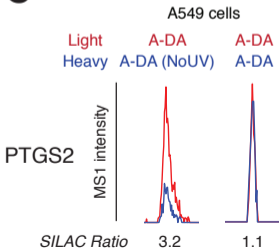**D**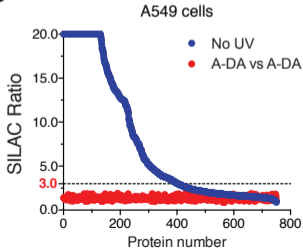

Supplement: NIHMS694110-supplement-5.pdf [file NIHMS694110-supplement-5.pdf]

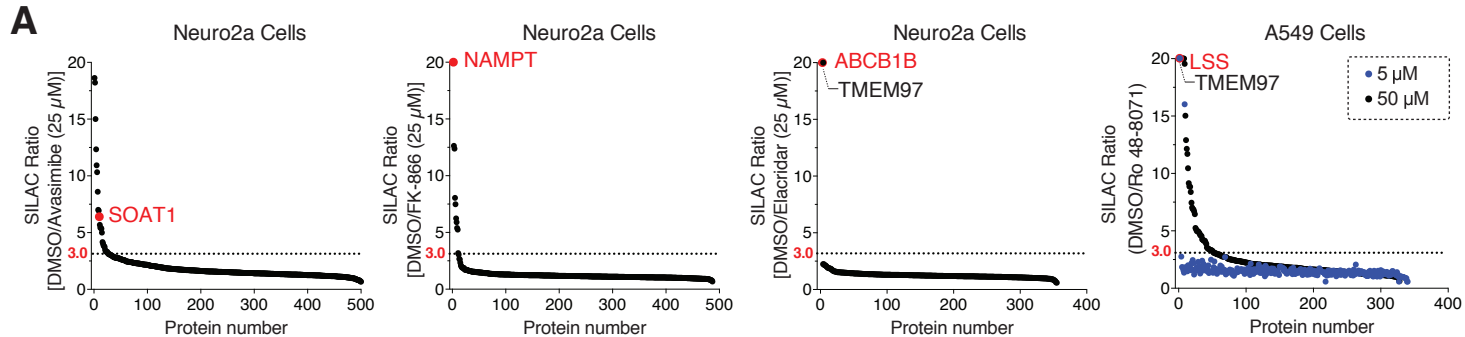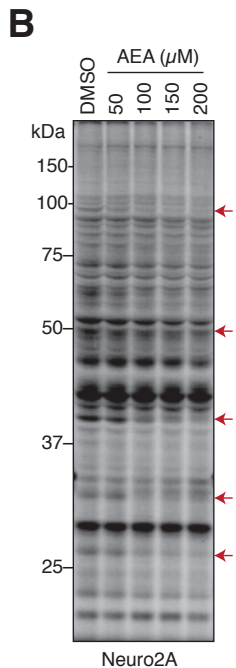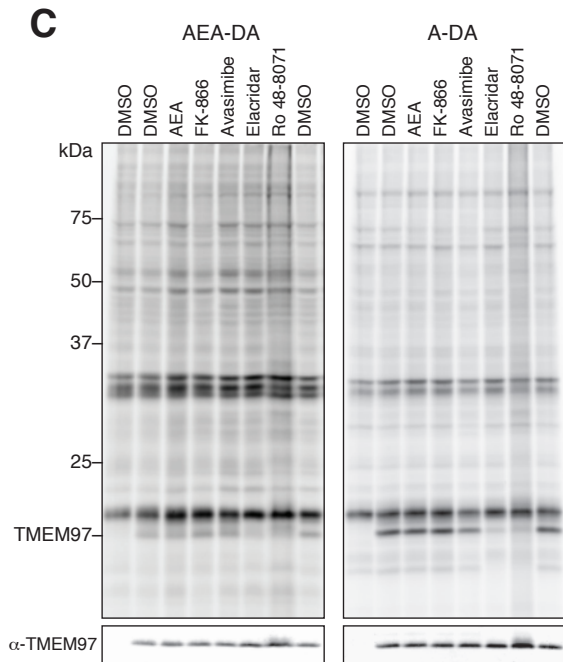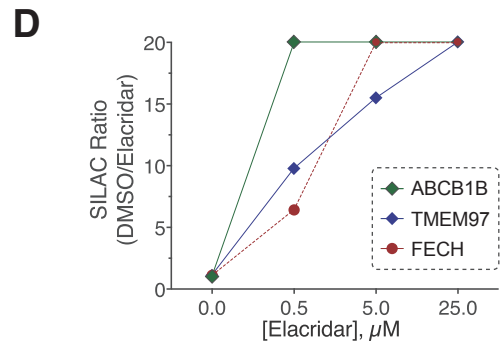

Supplement: NIHMS694110-supplement-6.pdf [file NIHMS694110-supplement-6.pdf]

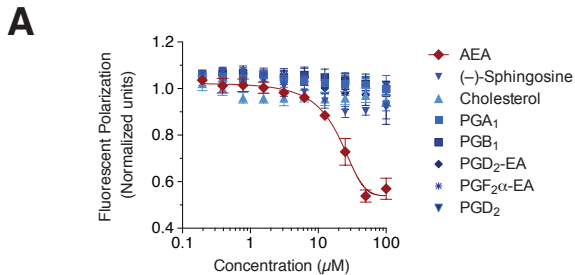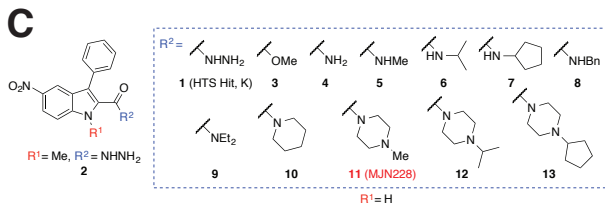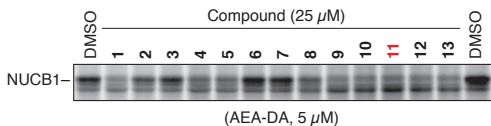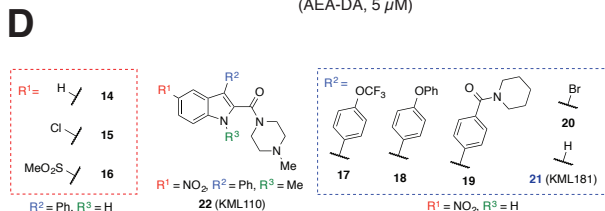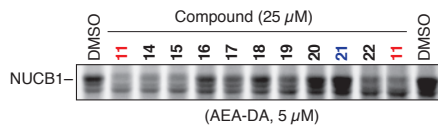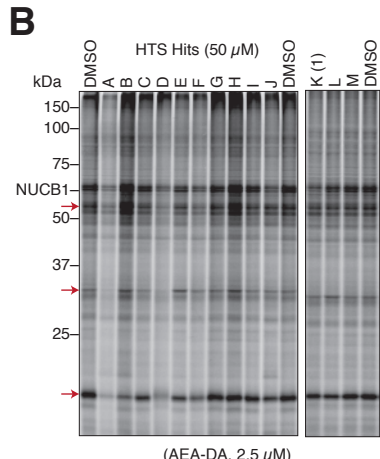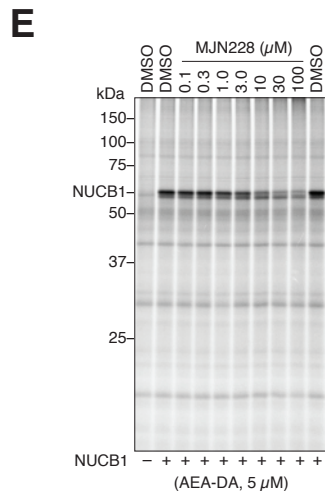

Supplement: NIHMS694110-supplement-7.pdf [file NIHMS694110-supplement-7.pdf]
